# Supplementary material for: Stable Nuclear Transformation System for the Coccolithophorid Alga Pleurochrysis carterae
Source: PubMed Central journal article supplement (PMC4779993; doi:10.1038/srep22252), 2016-03-07
Supplement: srep22252-s1.pdf [file srep22252-s1.pdf]

## Supplementary Information

Supplement to submitted manuscript titled:

### **Stable Nuclear Transformation System for the Coccolithophorid Alga *Pleurochrysis carterae***

Hirotohi Endo\*<sup>1, 2, 3</sup>, Megumi Yoshida<sup>3</sup>, Toshiki Uji<sup>4</sup>, Naotsune Saga<sup>5</sup>, Koji Inoue<sup>3</sup>  
& Hiromichi Nagasawa<sup>2, 6</sup>

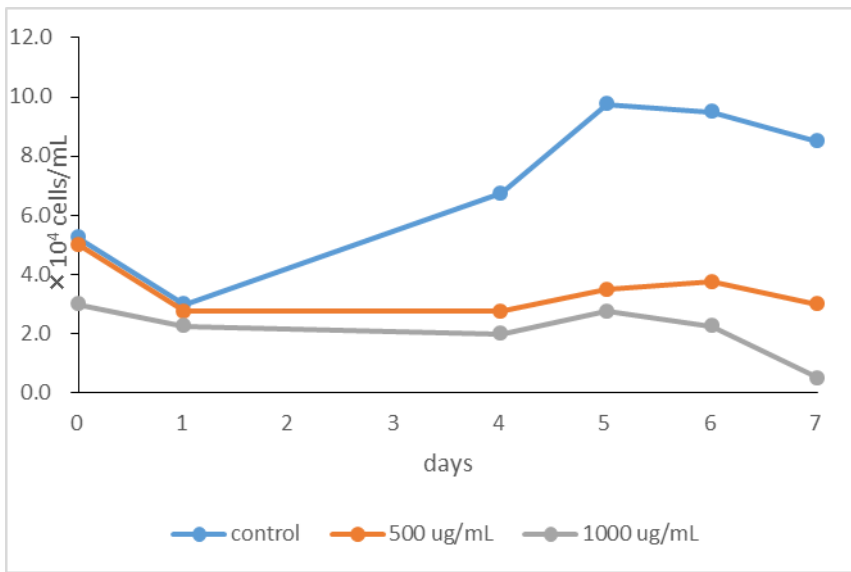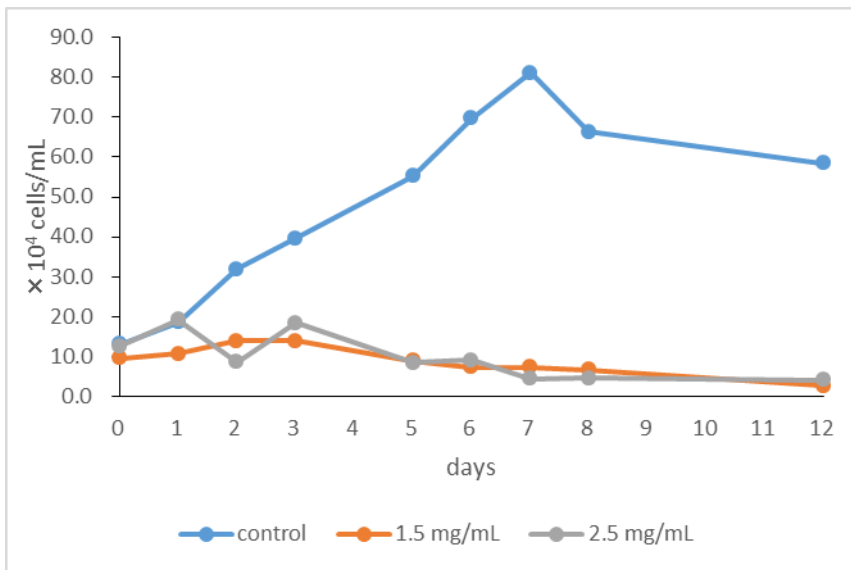

**Supplementary Figure 1| Hygromycin B-resistance test of *P. carterae*.**

Hygromycin B concentrations of 0.5, 1.0 mg/ml (a) and 1.5, 2.5 mg/ml (b) were tested in the liquid SLEP medium. The cells in the late logarithmic phase were used in the study.

## Supplementary Figure 2

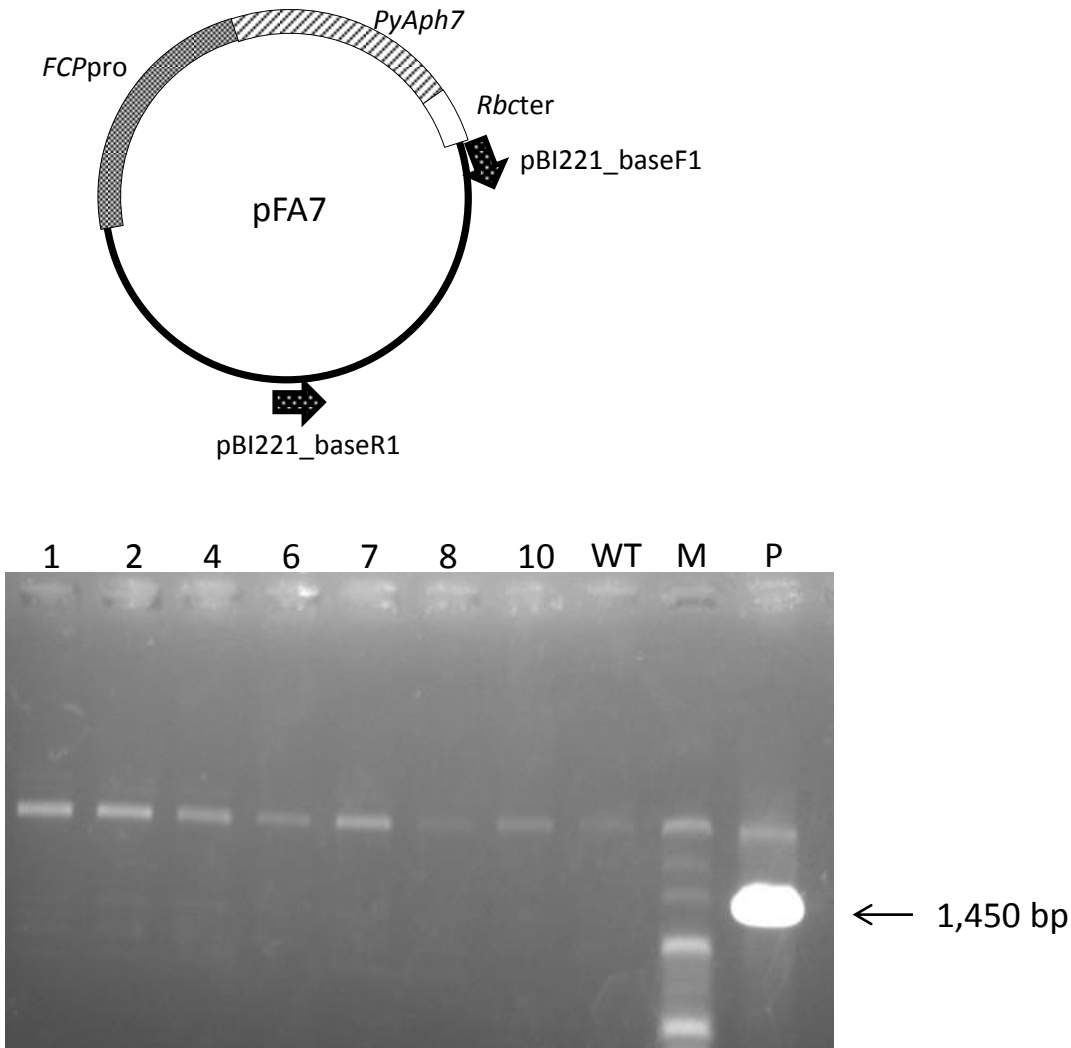

### **Supplementary Figure 2| Schematic of the expression construct pFA7 and agarose gel electrophoresis of PCR products amplifying the adjacent region to the CrRbcS terminator in pFA7 (Fig. 2).**

The numerals represent the ID numbers of the mutant strains. WT, M, and P represent the wild type strain, molecular marker, and pFA7, respectively. PCR was carried out with the primers pBI221\_baseF1 (5'-GAATTCAGTGGCCGTCGTTT-3') and pBI221\_baseR1 (5'-AATCAGTGAGGCACCTATCTA-3'), under the following conditions: 94°C 30 s, 54°C 30 s, 72°C 90 s, 35 cycles. A fragment of 1,450 bp derived from a circular vector template was amplified only in the positive control experiment (Lane P).
